# Supplementary material for: Selective Bacteriocins: A Promising Treatment for Staphylococcus aureus Skin Infections Reveals Insights into Resistant Mutants, Vancomycin Resistance, and Cell Wall Alterations
Source: MDPI journal article supplement (doi:10.3390/antibiotics12060947), 2023-05-23
Supplement: s1 [file s1]

# Supplementary materials

## *Transmission Electron Microscopy (TEM) Additional images*

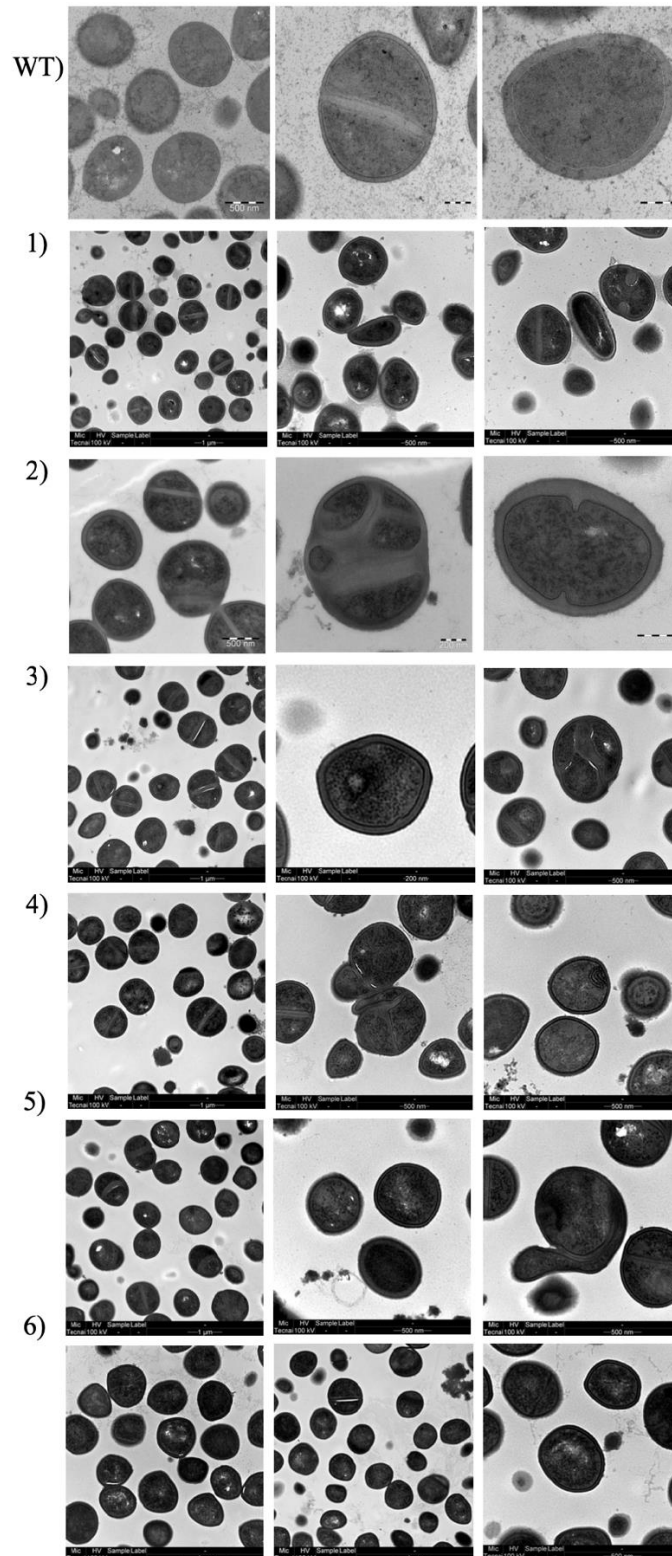

Figure S1: Supplementary TEM images of the wild-type *S. aureus* ATCC 6538 strain and six mutant strains resistant to Cerein 7B selective pressure. Some of the images reveal aberrant cell division events in the mutant strains

## Cerein 7B alanine scanning

Table S1, Alanine scanning of cerein 7B – mutation list and spot assays results

| Bacteriocin    | Plate | Amino acid sequence                                       | <i>L. lactis</i> | <i>S. aureus</i> |
|----------------|-------|-----------------------------------------------------------|------------------|------------------|
| WT             | A1    | GWWNSWGKCVAGTIGGAGTGGLGAAAGSAVPVIGTGIGGAIGGVSGGLTGAATFC   | (+)              | (+)              |
| Cerein 7B-G1A  | A2    | AWWNSWGKCVAGTIGGAGTGGLGAAAGSAVPVIGTGIGGAIGGVSGGLTGAATFC   | (+)              | -                |
| Cerein 7B-W2A  | A3    | GAWNSWGKCVAGTIGGAGTGGLGAAAGSAVPVIGTGIGGAIGGVSGGLTGAATFC   | -                | -                |
| Cerein 7B-W3A  | A4    | GWANSWGKCVAGTIGGAGTGGLGAAAGSAVPVIGTGIGGAIGGVSGGLTGAATFC   | -                | -                |
| Cerein 7B-N4A  | A5    | GWWASWGKCVAGTIGGAGTGGLGAAAGSAVPVIGTGIGGAIGGVSGGLTGAATFC   | (+)              | (+)              |
| Cerein 7B-S5A  | A6    | GWWNASWGKCVAGTIGGAGTGGLGAAAGSAVPVIGTGIGGAIGGVSGGLTGAATFC  | (+)              | (+)              |
| Cerein 7B-W6A  | A7    | GWWNSAGKCVAGTIGGAGTGGLGAAAGSAVPVIGTGIGGAIGGVSGGLTGAATFC   | -                | -                |
| Cerein 7B-G7A  | A8    | GWWNSWAKCVAGTIGGAGTGGLGAAAGSAVPVIGTGIGGAIGGVSGGLTGAATFC   | (+)              | -                |
| Cerein 7B-K8A  | A9    | GWWNSWGAACVAGTIGGAGTGGLGAAAGSAVPVIGTGIGGAIGGVSGGLTGAATFC  | -                | -                |
| Cerein 7B-C9A  | A10   | GWWNSWGGKAVAGTIGGAGTGGLGAAAGSAVPVIGTGIGGAIGGVSGGLTGAATFC  | -                | -                |
| Cerein 7B-V10A | A11   | GWWNSWGGKAAAGTIGGAGTGGLGAAAGSAVPVIGTGIGGAIGGVSGGLTGAATFC  | -                | -                |
| Cerein 7B-G12A | A12   | GWWNSWGGKCAATIGGAGTGGLGAAAGSAVPVIGTGIGGAIGGVSGGLTGAATFC   | (+)              | -                |
| Cerein 7B-G13A | B1    | GWWNSWGGKCVAGTIGGAGTGGLGAAAGSAVPVIGTGIGGAIGGVSGGLTGAATFC  | (+)              | (+)              |
| Cerein 7B-I14A | B2    | GWWNSWGGKCVAGTIGGAGTGGLGAAAGSAVPVIGTGIGGAIGGVSGGLTGAATFC  | (+)              | -                |
| Cerein 7B-G15A | B3    | GWWNSWGGKCVAGTIGGAGTGGLGAAAGSAVPVIGTGIGGAIGGVSGGLTGAATFC  | (+)              | -                |
| Cerein 7B-G16A | B4    | GWWNSWGGKCVAGTIGGAGTGGLGAAAGSAVPVIGTGIGGAIGGVSGGLTGAATFC  | (+)              | (+)              |
| Cerein 7B-G18A | B5    | GWWNSWGGKCVAGTIGGAGTGGLGAAAGSAVPVIGTGIGGAIGGVSGGLTGAATFC  | (+)              | (+)              |
| Cerein 7B-T19A | B6    | GWWNSWGGKCVAGTIGGAGAGGLGAAAGSAVPVIGTGIGGAIGGVSGGLTGAATFC  | (+)              | -                |
| Cerein 7B-G20A | B7    | GWWNSWGGKCVAGTIGGAGTAGLGGAAAGSAVPVIGTGIGGAIGGVSGGLTGAATFC | (+)              | -                |
| Cerein 7B-G21A | B8    | GWWNSWGGKCVAGTIGGAGTAGLGGAAAGSAVPVIGTGIGGAIGGVSGGLTGAATFC | (+)              | (+)              |
| Cerein 7B-L22A | B9    | GWWNSWGGKCVAGTIGGAGTGGAGGAAAGSAVPVIGTGIGGAIGGVSGGLTGAATFC | -                | -                |
| Cerein 7B-G23A | B10   | GWWNSWGGKCVAGTIGGAGTGGLAGAAAGSAVPVIGTGIGGAIGGVSGGLTGAATFC | (+)              | (+)              |
| Cerein 7B-G24A | B11   | GWWNSWGGKCVAGTIGGAGTGGLGAAAGSAVPVIGTGIGGAIGGVSGGLTGAATFC  | -                | -                |
| Cerein 7B-G28A | B12   | GWWNSWGGKCVAGTIGGAGTGGLGAAAGSAVPVIGTGIGGAIGGVSGGLTGAATFC  | -                | -                |
| Cerein 7B-S29A | C1    | GWWNSWGGKCVAGTIGGAGTGGLGAAAGAAVPVIGTGIGGAIGGVSGGLTGAATFC  | (+)              | -                |
| Cerein 7B-V31A | C2    | GWWNSWGGKCVAGTIGGAGTGGLGAAAGSAAPVIGTGIGGAIGGVSGGLTGAATFC  | (+)              | -                |
| Cerein 7B-P32A | C3    | GWWNSWGGKCVAGTIGGAGTGGLGAAAGSAVPVIGTGIGGAIGGVSGGLTGAATFC  | (+)              | -                |
| Cerein 7B-V33A | C4    | GWWNSWGGKCVAGTIGGAGTGGLGAAAGSAVPVIGTGIGGAIGGVSGGLTGAATFC  | (+)              | -                |
| Cerein 7B-I34A | C5    | GWWNSWGGKCVAGTIGGAGTGGLGAAAGSAVPVAGTGIGGAIGGVSGGLTGAATFC  | -                | -                |
| Cerein 7B-G35A | C6    | GWWNSWGGKCVAGTIGGAGTGGLGAAAGSAVPVATGIGGAIGGVSGGLTGAATFC   | -                | -                |
| Cerein 7B-T36A | C7    | GWWNSWGGKCVAGTIGGAGTGGLGAAAGSAVPVIGAGIGGAIGGVSGGLTGAATFC  | (+)              | -                |
| Cerein 7B-G37A | C8    | GWWNSWGGKCVAGTIGGAGTGGLGAAAGSAVPVIGTAGIGGAIGGVSGGLTGAATFC | (+)              | (+)              |
| Cerein 7B-I38A | C9    | GWWNSWGGKCVAGTIGGAGTGGLGAAAGSAVPVIGTAGGAIGGVSGGLTGAATFC   | -                | -                |
| Cerein 7B-G39A | C10   | GWWNSWGGKCVAGTIGGAGTGGLGAAAGSAVPVIGTAGAIGGVSGGLTGAATFC    | (+)              | -                |
| Cerein 7B-G40A | C11   | GWWNSWGGKCVAGTIGGAGTGGLGAAAGSAVPVIGTAGAIGGVSGGLTGAATFC    | (+)              | (+)              |
| Cerein 7B-I42A | C12   | GWWNSWGGKCVAGTIGGAGTGGLGAAAGSAVPVIGTGIGGAAGGVSGGLTGAATFC  | -                | -                |
| Cerein 7B-G43A | D1    | GWWNSWGGKCVAGTIGGAGTGGLGAAAGSAVPVIGTGIGGAAGVSGGLTGAATFC   | -                | -                |
| Cerein 7B-G44A | D2    | GWWNSWGGKCVAGTIGGAGTGGLGAAAGSAVPVIGTGIGGAAGVSGGLTGAATFC   | (+)              | (+)              |
| Cerein 7B-V45A | D3    | GWWNSWGGKCVAGTIGGAGTGGLGAAAGSAVPVIGTGIGGAAGASGGLTGAATFC   | (+)              | -                |
| Cerein 7B-S46A | D4    | GWWNSWGGKCVAGTIGGAGTGGLGAAAGSAVPVIGTGIGGAAGVAGGLTGAATFC   | (+)              | (+)              |
| Cerein 7B-G47A | D5    | GWWNSWGGKCVAGTIGGAGTGGLGAAAGSAVPVIGTGIGGAAGVAGLTGAATFC    | -                | -                |
| Cerein 7B-G48A | D6    | GWWNSWGGKCVAGTIGGAGTGGLGAAAGSAVPVIGTGIGGAAGVSGALTGAATFC   | (+)              | (+)              |
| Cerein 7B-L49A | D7    | GWWNSWGGKCVAGTIGGAGTGGLGAAAGSAVPVIGTGIGGAAGVSGGATGAATFC   | -                | -                |
| Cerein 7B-T50A | D8    | GWWNSWGGKCVAGTIGGAGTGGLGAAAGSAVPVIGTGIGGAAGVSGGLAGATFC    | (+)              | -                |
| Cerein 7B-G51A | D9    | GWWNSWGGKCVAGTIGGAGTGGLGAAAGSAVPVIGTGIGGAAGVSGGLTAATFC    | (+)              | (+)              |
| Cerein 7B-T54A | D10   | GWWNSWGGKCVAGTIGGAGTGGLGAAAGSAVPVIGTGIGGAAGVSGGLTGAAATFC  | (+)              | (+)              |
| Cerein 7B-F55A | D11   | GWWNSWGGKCVAGTIGGAGTGGLGAAAGSAVPVIGTGIGGAAGVSGGLTGAATAC   | -                | -                |
| Cerein 7B-C56A | D12   | GWWNSWGGKCVAGTIGGAGTGGLGAAAGSAVPVIGTGIGGAAGVSGGLTGAATFA   | -                | -                |

“(+)” represent an activity, the presence of an inhibition halo on the plate, while “-” represents no activity, the absence of an inhibition halo on the plate.

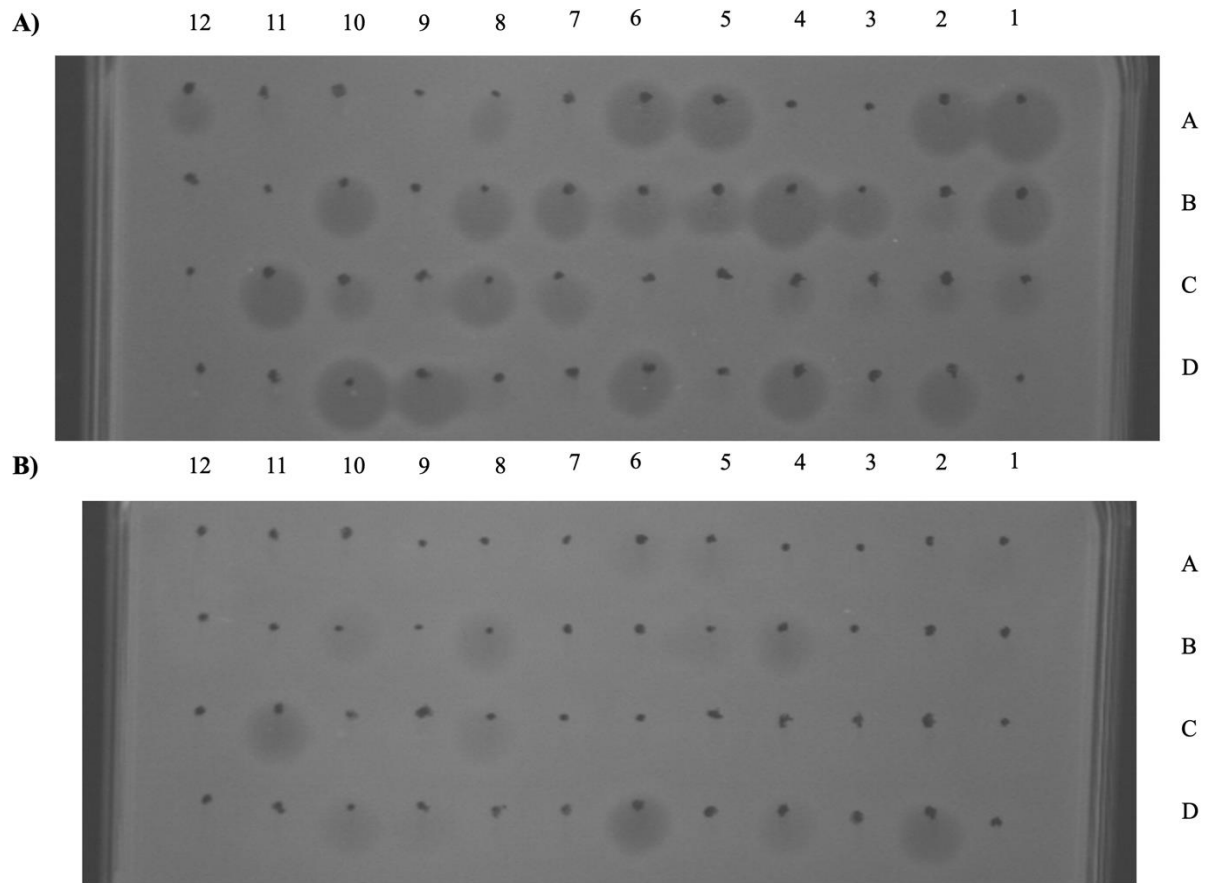

Figure S2: (A,B) displays the spot assays of the 48 bacteriocins that were produced in vitro, with the positions of the wild-type and mutant variants indicated in Table 1. Inhibition halos are observed in regions where the mutated versions of bacteriocins exhibited activity.

### Differences in between the *S. aureus* ATCC 6538 used in this study and its reference genome (NZ\_CP20020)

| POS     | TYPE | REF | ALT | FTYPE | STRAND | NT_POS    | AA_POS  | EFFECT                                           | LOCUS_TAG     | GENE |
|---------|------|-----|-----|-------|--------|-----------|---------|--------------------------------------------------|---------------|------|
| 55146   | snp  | G   | A   | CDS   | +      | 145/483   | 49/160  | missense_variant c.145G>A p.Asp49Asn             | B4602_RS00250 |      |
| 109242  | snp  | T   | C   | CDS   | +      | 254/663   | 85/220  | missense_variant c.254T>C p.Val85Ala             | B4602_RS00495 | deoC |
| 266876  | snp  | T   | G   | CDS   | +      | 802/1437  | 268/478 | missense_variant c.802T>G p.Tyr268Asp            | B4602_RS01165 |      |
| 315858  | snp  | T   | G   | CDS   | +      | 303/924   | 101/307 | missense_variant c.303T>G p.Ile101Met            | B4602_RS01440 |      |
| 574451  | snp  | A   | T   | CDS   | +      | 1671/2826 | 557/941 | missense_variant c.1671A>T p.Arg557Ser           | B4602_RS02790 | sdrC |
| 777056  | snp  | T   | C   | CDS   | +      | 19/573    | 7/190   | missense_variant c.19T>C p.Tyr7His               | B4602_RS03865 | raiA |
| 936739  | snp  | A   | G   | CDS   | +      | 214/927   | 72/308  | missense_variant c.214A>G p.Ser72Gly             | B4602_RS04750 |      |
| 975730  | snp  | T   | C   | CDS   | +      | 118/2325  | 40/774  | stop_lost c.118T>C p.Ter40Glnext?                | B4602_RS04930 |      |
| 1008961 | mnp  | TT  | GC  | CDS   | -      | 305/435   | 102/144 | missense_variant c.304_305delAAinsGC p.Asn102Ala | B4602_RS05115 |      |
| 1092692 | snp  | G   | C   | CDS   | +      | 235/324   | 79/107  | missense_variant c.235G>C p.Asp79His             | B4602_RS05565 | isdG |
| 1098197 | ins  | A   | AT  | CDS   | -      | 921/927   | 307/308 | frameshift_variant c.921dupA p.Phe308fs          | B4602_RS05595 |      |
| 1205505 | snp  | A   | G   | CDS   | -      | 2562/2607 | 854/868 | synonymous_variant c.2562T>C p.Gly854Gly         | B4602_RS06140 | yfhO |
| 1413666 | snp  | T   | G   | CDS   | -      | 492/660   | 164/219 | missense_variant c.492A>C p.Lys164Asn            | B4602_RS07190 | arlR |
| 1482826 | snp  | A   | G   | CDS   | -      | 322/1293  | 108/430 | missense_variant c.322T>C p.Tyr108His            | B4602_RS07400 | asnS |
| 2052278 | snp  | C   | T   | CDS   | +      | 662/744   | 221/247 | missense_variant c.662C>T p.Ala221Val            | B4602_RS10625 |      |
| 2313648 | snp  | A   | G   | CDS   | +      | 617/690   | 206/229 | missense_variant c.617A>G p.Asp206Gly            | B4602_RS12055 |      |
| 2382502 | mnp  | AT  | CA  |       |        |           |         |                                                  |               |      |

Table S2, presents a comparison between the reference genome (NZ\_CP020020) and the DNA sequencing data generated from the *S. aureus* ATCC 6538 strain utilized in this study. The table includes detailed information regarding the position of each mutation, its type, the corresponding DNA mutation, the nucleotide position within the coding region, the amino acid position in the protein sequence, the mutation's effect, the locus-tag where the mutation is localized, and the corresponding gene affected if annotated in the reference genome.

*Transmission Electron Microscopy comparison stationary phase with exponential phase*

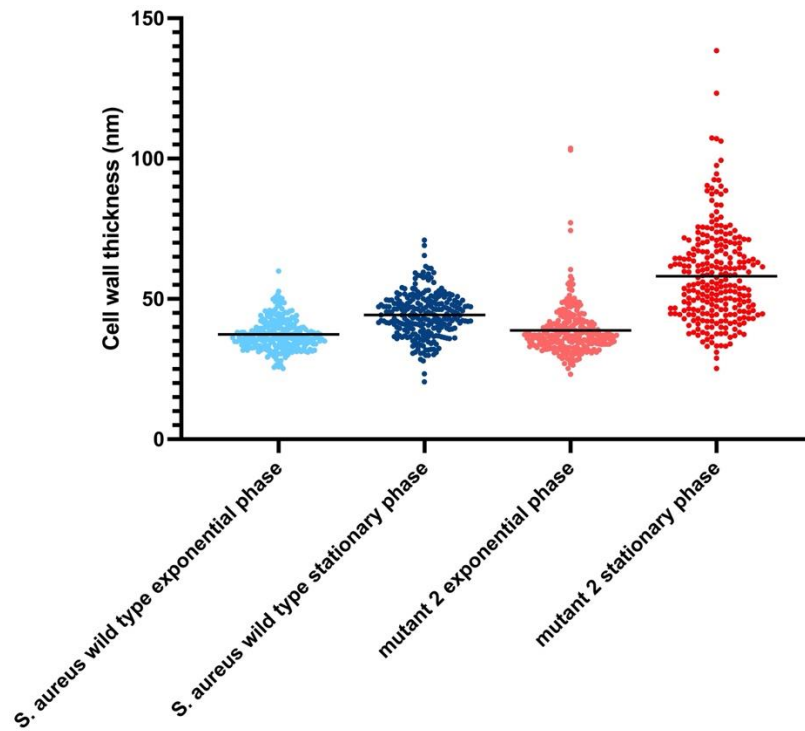

Figure S3 presents the results of transmission electron microscopy (TEM) measurement of the cell wall thickness in exponential phase and in the stationary phase for both the wild-type strain of *Staphylococcus aureus* ATCC 6538 and the isolated mutant 2. The TEM images provide insight into the comparison of the cell wall thickness between the two strains, offering valuable information about the cell wall thickness in various growth stages.
